# Supplementary material for: Long Noncoding RNA miR210HG as a Potential Biomarker for the Diagnosis of Glioma
Source: PLoS One. 2016 Sep 27;11(9):e0160451. doi: 10.1371/journal.pone.0160451 (PMC5038942; doi:10.1371/journal.pone.0160451)
Supplement: S3 Table — (XLSX) [file pone.0160451.s004.xlsx]

## Sheet: Sheet1
ID	Admission Number	Gender	Age	Glioma Grade	Immunohistochemistry																					Genome Test
1	949317	Male	70	WHO III	VIM(±)	CD34(+)	LCA(-)	S-100(+)	P53(5%)	GFAP(+)	MGMT(1+)	Olig-2(+)	Ki-67(5%)	Nestin(+)	SOX-10(±)	-	-	-	-	-						1p36 intergritive	19q13 intergritive
2	959111	Male	55	WHO III	VIM(-)	CD34(-)	LCA(-)	S-100(+)	P53(10%)	GFAP(±)	MGMT(-)	Olig-2(+)	Ki-67(20%)	Nestin(-)	SOX-10(-)	NeuN(neuron+)	CD99(±)	NSE(±)	IDH-1(+)	-						1p36 intergritive	19q13 intergritive
3	954038	Male	65	WHO IV	VIM(±)	CD34(-)	LCA(-)	S-100(±)	P53(2%)	GFAP(+)	MGMT(2+)	Olig-2(+)	Ki-67(30%)	Nestin(+)	-	NeuN(±)	CD99(+)	NSE(±)	IDH-1(-)	Syn(-)						1p36 defective	19q13 intergritive
4	950453	Male	53	WHO IV	VIM(+)	CD34(+)	LCA(-)	S-100(+)	P53(4%)	GFAP(+)	MGMT(2+)	Olig-2(±)	Ki-67(20%)	Nestin(+)	SOX-10(±)	NeuN(neuron+)	CD99(+)	-	IDH-1(-)	Syn(+)						1p36 defective	19q13 intergritive
5	938222	Male	58	WHO IV	VIM(±)	CD34(+)		S-100(+)	P53(±)	GFAP(+)	MGMT(+)	Olig-2(±)	Ki-67(10%)	Nestin(+)		NeuN(-)	CD99(+)		IDH-1(-)	Syn(-)	EMA(-)	P16(-)				1p36 defective	19q13 intergritive
6	942644	Male	59	WHO III	VIM(-)	CD34(-)		S-100(+)	P53(5%)	GFAP(+)	MGMT(±)	Olig(+)	Ki-67(5%)	Nestin(±)		NeuN(nerve cell+)	CD99(+)		IDH-1(+)	Syn(-)	EMA(-)					1p36 intergritive	19q13 intergritive
7	946542	Female	51	WHO III	VIM(±)	CD34(+)	LCA(-)	S-100(+)	P53(-)	GFAP(+)	MGMT(-)	Olig(+)	Ki-67(5%)	Nestin(-)			CD99(+)		IDH-1(±)	Syn(+)						1p36 defective	19q13 intergritive
8	949676	Female	47	WHO II~III	VIM(±)			S-100(+)	P53(20%)	GFAP(+)	MGMT(1+)	Olig-2(+)	Ki-67(3%)	Nestin(±)			CD99(+)		IDH-1(+)	Syn(+)						1p36 intergritive	19q13 intergritive
9	949836	Male	51	WHO II	VIM(±)	CD34(-)	LCA(-)	S-100(+)	P53(-)	GFAP(+)	MGMT(1+)	Olig-2(-)	Ki-67(2%)	Nestin(+)	SOX-10(±)	NeuN(-)	CD99(+)		IDH-1(+)	Syn(+)						1p36 intergritive	19q13 intergritive
10	923651	Female	34	WHO II	VIM(-)	CD34(-)		S-100(+)	P53(±)	GFAP(+)	MGMT(-)	Olig-2(+)	Ki-67(5%)	Nestin(-)	SOX-10(±)	NeuN(-)			IDH-1(+)	Syn(±)		P16(-)				1p36 defective	19q13 defective
11	933181	Female	65	WHO IV	VIM(+)	CD34(-)	LCA(-)	S-100(+)	P53(20%)	GFAP(+)	MGMT(1+)	Olig-2(+)	Ki-67(20%)	Nestin(+)		NeuN(nerve cell+)	CD99(+)		IDH-1(+)	Syn(-)						1p36 intergritive	19q13 defective
12	932827	Female	66	WHO III	VIM(±)	CD34(+)	LCA(-)	S-100(+)	P53(2%)	GFAP(+)	MGMT(<5%)	Olig-2(+)	Ki-67(>40%)	Nestin(±)		NeuN(nerve cell+)			IDH-1(+)	Syn(±)			SMA(+)	TTF1(-)		1p36 defective	19q13 intergritive
13	932358	Female	63	WHO IV	VIM(+)	CD34(-)	LCA(-)	S-100(+)	P53(+)	GFAP(+)	MGMT(+)	Olig-2(±)	Ki-67(40%)	Nestin(+)		NeuN(-)	CD99(±)		IDH-1(-)	Syn(-)		P16(-)				1p36 intergritive	19q13 intergritive
14	914611	Male	44	WHO IV	VIM(+)	CD34(-)	LCA(-)	S-100(-)	P53(80%)	GFAP(+)	MGMT(3+)	Olig-2(±)	Ki-67(40%)	Nestin(+)		NeuN(-)	CD99(+)	NSE(±)	IDH-1(+)							1p36 intergritive	19q13 intergritive
15	924222	Male	46	WHO III~IV	VIM(+)	CD34(-)		S-100(+)	P53(90%)	GFAP(+)	MGMT(-)	Olig-2(+)	Ki-67(30%)	Nestin(+)		NeuN(-)			IDH-1(+)	Syn(+)		P16(-)				1p36 intergritive	19q13 intergritive
16	931570	Male	54	WHO IV	VIM(+)	CD34(-)		S-100(+)	P53(-)	GFAP(+)	MGMT(-)	Olig-2(-)	Ki-67(20%)	Nestin(+)		NeuN(-)	CD99(+)		IDH-1(-)	Syn(-)		P16(-)				1p36 intergritive	19q13 intergritive
17	916052	Male	57	WHO III	VIM(+)	CD34(+)	LCA(-)	S-100(+)	P53(3%)	GFAP(+)	MGMT(1+)	Olig-2(+)	Ki-67(15%)	Nestin(+)		NeuN(bulk+)	CD99(+)		IDH-1(-)	Syn(±)						1p36 intergritive	19q13 intergritive
18	914500	Male	56	WHO IV	VIM(+)	CD34(-)	LCA(-)	S-100(+)	P53(1%)	GFAP(+)	MGMT(+)	Olig-2(-)	Ki-67(30%)	Nestin(+)		NeuN(-)	CD99(+)		IDH-1(-)	Syn(-)						1p36 defective	19q13 intergritive
19	946793	Male	53	WHO III	VIM(±)	CD34(+)	LCA(-)	S-100(+)	P53(40%)	GFAP(+)	MGMT(2+)	Olig-2(+)	Ki-67(30%)	Nestin(±)			CD99(±)		IDH-1(±)	Syn(±)						1p36 intergritive	19q13 intergritive
20	962220	Male	49	WHO II	VIM(+)		LCA(-)	S-100(+)	P53(-)	GFAP(+)	MGMT(2+)	Olig-2(+)	Ki-67(3%)	Nestin(-)	SOX-10(+)	NeuN(±)			IDH-1(+)
21	951669	Female	40	WHO III	VIM(-)	CD34(+)	LCA(-)	S-100(+)	P53(3%)	GFAP(±)	MGMT(-)	Olig-2(+)	Ki-67(5%)	Nestin(±)	SOX-10(+)		CD99(±)		IDH-1(+)	Syn(+)						1p36 defective	19q13 defective
22	930938	Female	46	WHO IV	VIM(+)	CD34(-)		S-100(+)	P53(80%)	GFAP(+)	MGMT(-)	Olig-2(+)	Ki-67(40%)	Nestin(+)		NeuN(-)	CD99(+)		IDH-1(-)	Syn(-)	EMA(-)					1p36 intergritive	19q13 defective
23	943193	Male	65	WHO IV	VIM(±)	CD34(+)	LCA(-)	S-100(+)	P53(80%)	GFAP(±)	MGMT(-)	Olig-2(+)	Ki-67(50%)	Nestin(+)		NeuN(neuron+)	CD99(±)		IDH-1(+)	Syn(-)						1p36 intergritive	19q13 intergritive
24	941909	Female	25	WHO II	VIM(-)	CD34(-)	LCA(-)	S-100(+)	P53(±)	GFAP(+)	MGMT(1+)	Olig-2(+)	Ki-67(2%)	Nestin(±)		NeuN(nerve cell+)	CD99(±)		IDH-1(-)	Syn(±)						1p36 defective	19q13 defective
25	966324	Female	48	WHO IV	VIM(±)			S-100(+)	P53(80%)	GFAP(±)	MGMT(-)	Olig-2(+)	Ki-67(30%)	Nestin(±)	SOX-10(+)	NeuN(±)	CD99(+)	NSE(+)	IDH-1(+)						CD20(-)	1p36 intergritive	19q13 intergritive
26	962341	Female	31	WHO II	VIM(+)	CD34(+)	LCA(-)	S-100(+)		GFAP(+)	MGMT(-)	Olig-2(+)	Ki-67(3%)	Nestin(±)	SOX-10(±)	NeuN(+)		NSE(+)	IDH-1(+)							1p36 intergritive	19q13 defective
27	956729	Female	66	WHO IV	VIM(±)		LCA(-)	S-100(+)	P53(15%)	GFAP(+)	MGMT(2+)	Olig-2(+)	Ki-67(25%)	Nestin(+)	SOX-10(±)	NeuN(nerve cell+)	CD99(±)	NSE(±)	IDH-1(-)							1p36 defective	19q13 intergritive
28	969771	Male	30	WHO III	VIM(+)	CD34(+)		S-100(+)	P53(80%)	GFAP(+)	MGMT(±)	Olig-2(+)	Ki-67(4%)	Nestin(+)	SOX-10(±)	NeuN(±)	CD99(+)		IDH-1(+)	Syn(±)				TTF1(-)		1p36 intergritive	19q13 intergritive

## Sheet: Sheet3
性别	0.127424	年龄	0.0315731	分级	0.0455156	神经元	0.297623	CD99	0.051515	IDH	0.193968	Syn	0.444534	缺失	0.289908
1.03018	1.13982	1.03018	0.867094	1.03018	0.818188	0.818188	0.867094	0.818188	1.27293	0.818188	1.27293	0.818188	0.867094	1.03018	0.818188
1.27293	1.60341	1.27293	1.13982	1.27293	0.867094	0.953184	1.25061	0.867094	2.10658	0.867094	2.07757	0.953184	1.13982	1.27293	0.867094
0.818188	0.887349	2.80727	1.60341	2.07757	0.953184	0.56634	1.75142	0.953184	1.25075	0.953184	1.13982	2.07757	1.60341	2.07757	0.953184
0.867094	1.25061	0.953184	0.995492	1.13982	1.25061	2.80727	1.25075	2.07757	2.15751	0.56634	1.60341	0.887349	0.995492	1.60341	1.13982
0.953184	2.7618	2.07757	0.887349	1.60341	0.56634	0.555729	2.15751	1.13982	1.27725	1.1374	0.995492	1.25061	0.555729	0.995492	0.887349
2.07757	0.56634	1.25061	0.818188	0.995492	0.679831	1.1374		1.60341		0.901953	0.887349	2.7618	0.901953	1.25061	2.7618
0.995492	2.24058	2.7618	0.555729	0.887349	0.555729	1.04446		0.995492		1.04446	1.25061	0.56634	1.27725	0.56634	1.04446
2.80727	1.89076	2.24058	1.1374	2.7618	1.1374	1.89076		1.25061		1.27725	2.7618	1.1374	2.24058	2.80727	2.24058
0.555729	2.10658	0.901953	1.27725	0.901953	1.04446			0.56634		1.89076	2.80727	1.04446	2.10658	0.555729	2.10658
1.1374	1.25075	1.04446	1.14718	1.27725	1.89076			2.80727		2.10658	0.555729	1.89076	1.28796	1.1374	2.15751
0.901953	0.679831	1.75142	2.24058	1.14718	1.75142			1.1374		2.15751	1.14718	1.75142		0.901953
1.04446	2.15751	2.15751	1.89076	2.24058	1.25075			0.901953			2.24058			1.27725
1.27725			2.10658	2.10658	2.15751			1.04446			1.75142			1.89076
1.14718			1.25075	2.80727				1.27725			1.25075			1.75142
1.75142			0.679831	1.28796				2.24058			0.679831			1.25075
1.28796			1.28796					1.89076			1.28796			0.679831
								1.75142						1.28796
								1.28796
1.24533	1.54461	1.68746	1.24284	1.56916	1.14794
